# Supplementary material for: Growth of α-Si3N4nanobelts via Ni-catalyzed thermal chemical vapour deposition and their violet-blue luminescent properties
Source: Royal Society of Chemistry journal article supplement (doi:10.1039/c2ce26484f), 2012-11-08
Supplement: c2ce26484f.pdf [file c2ce26484f.pdf]

## Electronic Supplementary Information

### Growth of $\alpha$ - $\text{Si}_3\text{N}_4$ nanobelts via Ni-catalyzed thermal chemical vapour deposition and their violet-blue luminescent properties

Juntong Huang,<sup>a,b</sup> Shaowei Zhang,<sup>\*b,c</sup> Zhaohui Huang,<sup>\*a</sup> Yan'gai Liu,<sup>a</sup> Minghao Fang<sup>a</sup>

<sup>a</sup>*School of Materials Science and Technology, China University of Geosciences (Beijing), Beijing 100083, P. R. China*

<sup>b</sup>*Department of Materials Science and Engineering, University of Sheffield, Sheffield S1 3JD, UK*

<sup>c</sup>*College of Engineering, Mathematics and Physical Sciences, University of Exeter, Exeter EX4 4QF, UK*

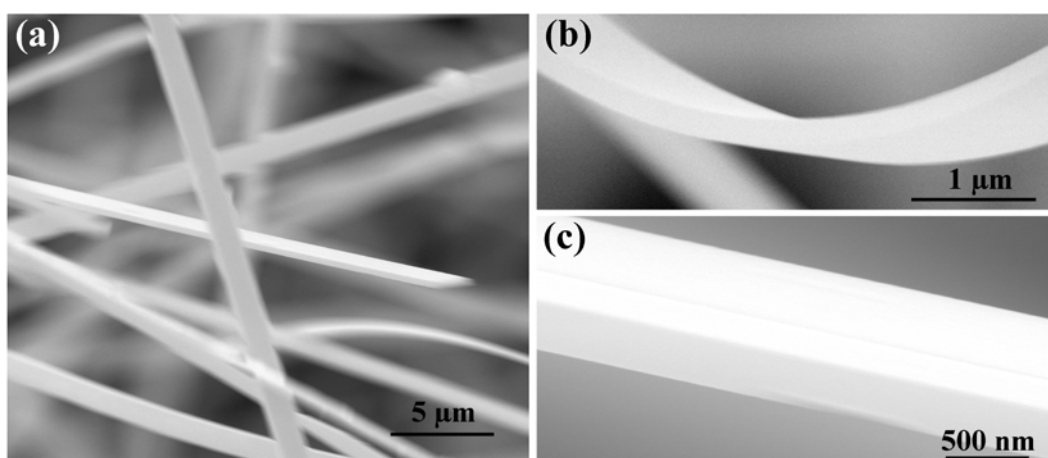

**Figure S1** High-magnification SEM images of the as-synthesized products, revealing that they exhibit belt-like structures with widths from 300 to 1200 nm and width/thickness ratios from 3 to 8.

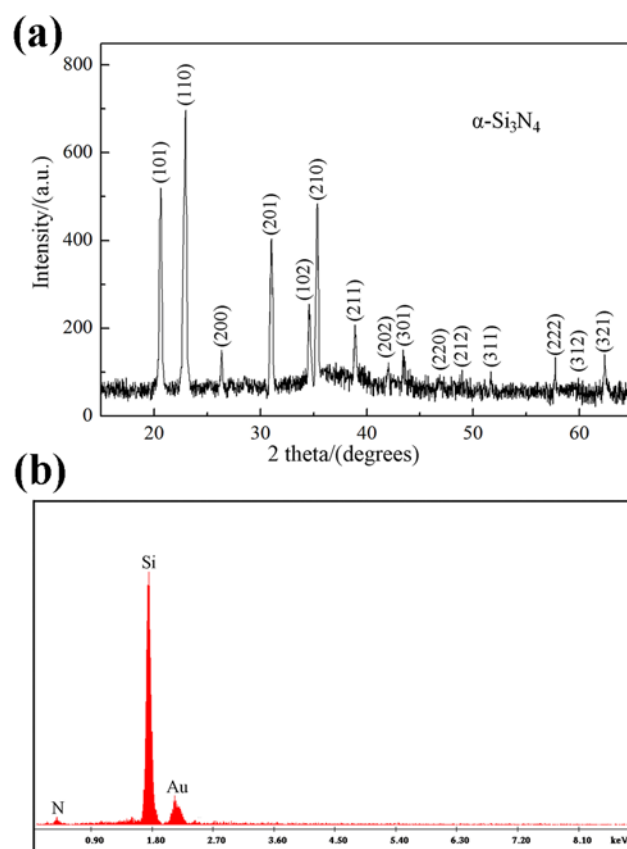

**Figure S2** (a) XRD pattern (b) EDS pattern of the products formed on the carbon felt substrate without using Ni catalyst.

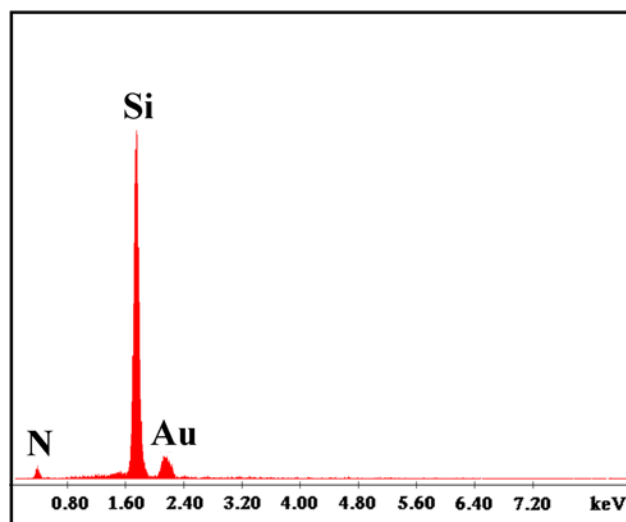

**Figure S3** EDS pattern of the nanorods, reveals that they are  $\text{Si}_3\text{N}_4$ .
